# Supplementary material
Source: Springer Nature journal article supplement (https://www.springermedizin.de/resource/supplementary/13063_2012_1035_MOESM4_ESM.pdf/9619370)

# Timely R&D approval for new protocol

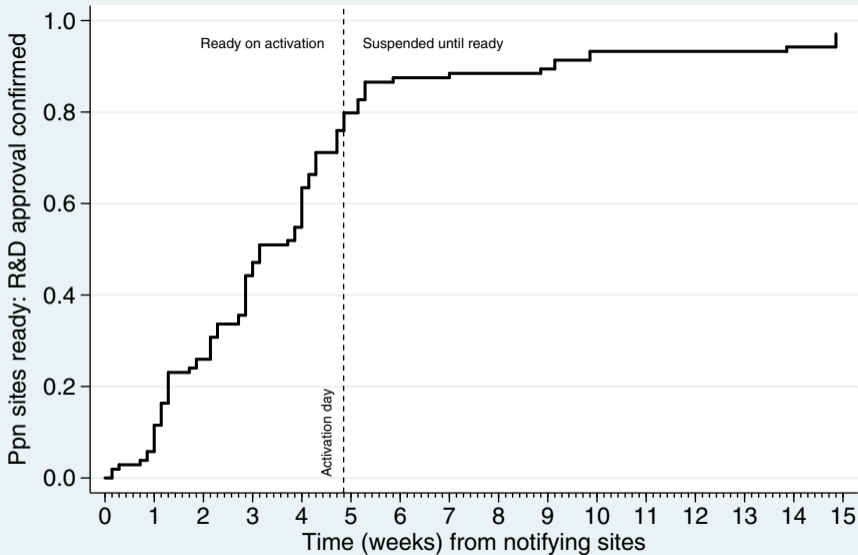

Sites needing

approval

104 (6) 98 (21) 77 (19) 58 (11) 47 (26) 21 (8) 13 (0) 13 (1) 12 (1) 11 (4) 7 (0) 7 (0) 7 (0) 7 (0) 7 (1) 6 (3) 3

Supplement: MOESM4 [file 9619370]
